# Supplementary material
Source: PubMed Central journal article supplement (PMC4787493)
Supplement: moom654327.wt1_default.pdf [file moom654327.wt1_default.pdf]

**Web table A** Top 20 most frequently used diagnostic labels

| Rank | Diagnostic label                      | Frequency (number of episodes) | Percentage |
|------|---------------------------------------|--------------------------------|------------|
| 1    | DEPRESSION                            | 145 291                        | 22.99      |
| 2    | Depressive disorder NEC               | 123 407                        | 19.53      |
| 3    | [X]Depression NOS                     | 60 803                         | 9.62       |
| 4    | Anxiety with depression               | 56 056                         | 8.87       |
| 5    | Depressed                             | 46 864                         | 7.41       |
| 6    | C/O feeling depressed                 | 26 120                         | 4.13       |
| 7    | O/E depressed                         | 25 496                         | 4.03       |
| 8    | H/O depression                        | 25 134                         | 3.98       |
| 9    | Neurotic depression reactive type     | 20 558                         | 3.25       |
| 10   | Agitated depression                   | 16 782                         | 2.66       |
| 11   | ANXIETY DEPRESSION                    | 13 876                         | 2.20       |
| 12   | Endogenous depression                 | 13 111                         | 2.07       |
| 13   | Postnatal depression                  | 11 136                         | 1.76       |
| 14   | Endogenous depression: first episode  | 10 055                         | 1.59       |
| 15   | Endogenous depression: recurrent      | 8159                           | 1.29       |
| 16   | Single major depressive episode       | 3310                           | 0.52       |
| 17   | Chronic depression                    | 3051                           | 0.48       |
| 18   | Recurrent depression                  | 2411                           | 0.38       |
| 19   | Single major depressive episode: mild | 1923                           | 0.30       |
| 20   | [X]Moderate depressive episode        | 1614                           | 0.26       |

Diagnostic labels in capital letters are old READ-OXMIS names, which were phased out in 2000.

C/O=complaining of; H/O=history of; NEC=not elsewhere classified; NOS=not otherwise specified; O/E=on examination.
