# Supplementary material
Source: PubMed Central journal article supplement (PMC4787493)
Supplement: moom654327.wt2_default.pdf [file moom654327.wt2_default.pdf]

**Web table B** Top 20 most common diagnostic labels for first diagnosis in each patient

| Rank | Diagnostic label                      | Frequency (number of patients) | Percentage |
|------|---------------------------------------|--------------------------------|------------|
| 1    | DEPRESSION                            | 47 916                         | 25.24      |
| 2    | Depressive disorder NEC               | 30 148                         | 15.88      |
| 3    | Depressed                             | 15 484                         | 8.16       |
| 4    | [X]Depression NOS                     | 15 268                         | 8.04       |
| 5    | Anxiety with depression               | 14 913                         | 7.86       |
| 6    | O/E depressed                         | 10 089                         | 5.31       |
| 7    | C/O feeling depressed                 | 9801                           | 5.16       |
| 8    | Neurotic depression reactive type     | 8455                           | 4.45       |
| 9    | H/O depression                        | 6155                           | 3.24       |
| 10   | ANXIETY DEPRESSION                    | 4966                           | 2.62       |
| 11   | Endogenous depression first episode   | 4666                           | 2.46       |
| 12   | Agitated depression                   | 4603                           | 2.42       |
| 13   | Postnatal depression                  | 4539                           | 2.39       |
| 14   | Endogenous depression                 | 3350                           | 1.76       |
| 15   | Endogenous depression - recurrent     | 1128                           | 0.59       |
| 16   | Single major depressive episode       | 925                            | 0.49       |
| 17   | REACTIVE DEPRESSION                   | 870                            | 0.46       |
| 18   | Puerperal depression                  | 554                            | 0.29       |
| 19   | Chronic depression                    | 453                            | 0.24       |
| 20   | Single major depressive episode, mild | 444                            | 0.23       |

Diagnostic labels in capital letters are old READ-OXMIS names, which were phased out in 2000.

C/O=complaining of; H/O=history of; NEC=not elsewhere classified; NOS=not otherwise specified; O/E=on examination.
