# Supplementary material
Source: PubMed Central journal article supplement (PMC4787493)
Supplement: moom654327.wt3_default.pdf [file moom654327.wt3_default.pdf]

**Web table C** Incidence per 1000 patient years of first ever episode of depression

|               | n(new)/n [in<br>1993] | Year of first diagnosis of depression |              |              |              |              |              |              |              |              |              |              |              |              |
|---------------|-----------------------|---------------------------------------|--------------|--------------|--------------|--------------|--------------|--------------|--------------|--------------|--------------|--------------|--------------|--------------|
|               |                       | 1993                                  | 1994         | 1995         | 1996         | 1997         | 1998         | 1999         | 2000         | 2001         | 2002         | 2003         | 2004         | 2005         |
| <b>Male</b>   | <b>4573/584 049</b>   | <b>7.83</b>                           | <b>8.04</b>  | <b>8.68</b>  | <b>8.96</b>  | <b>9.16</b>  | <b>9.07</b>  | <b>9.20</b>  | <b>9.31</b>  | <b>9.23</b>  | <b>8.61</b>  | <b>8.07</b>  | <b>7.41</b>  | <b>5.97</b>  |
| <18           | 53/13 250             | 0.41                                  | 0.67         | 0.85         | 0.92         | 0.95         | 0.87         | 1.01         | 1.17         | 1.23         | 1.14         | 0.99         | 1.02         | 0.90         |
| 18-30         | 1059/109 722          | 9.65                                  | 10.29        | 12.20        | 13.24        | 14.86        | 14.33        | 15.07        | 15.44        | 15.65        | 15.34        | 15.30        | 14.14        | 11.11        |
| 31-64         | 2644/266 488          | 9.92                                  | 10.32        | 10.89        | 11.08        | 11.33        | 11.41        | 11.46        | 11.50        | 11.39        | 10.61        | 9.86         | 8.90         | 7.25         |
| ≥65           | 817/77 589            | 10.53                                 | 9.60         | 9.74         | 9.94         | 8.67         | 8.66         | 8.54         | 8.57         | 8.21         | 7.04         | 6.07         | 5.84         | 4.62         |
| <b>Female</b> | <b>9493/599 849</b>   | <b>15.83</b>                          | <b>16.32</b> | <b>16.92</b> | <b>17.08</b> | <b>17.59</b> | <b>16.93</b> | <b>16.16</b> | <b>16.28</b> | <b>16.23</b> | <b>15.09</b> | <b>13.32</b> | <b>12.17</b> | <b>10.06</b> |
| <18           | 208/119 953           | 1.73                                  | 1.61         | 2.15         | 2.26         | 2.42         | 2.41         | 2.67         | 2.69         | 3.52         | 3.24         | 3.21         | 2.95         | 2.03         |
| 18-30         | 2562/107 797          | 23.77                                 | 26.00        | 30.40        | 31.44        | 34.94        | 34.62        | 33.17        | 36.91        | 37.72        | 37.64        | 34.09        | 31.72        | 26.42        |
| 31-64         | 4996/261 410          | 19.11                                 | 19.48        | 19.58        | 19.95        | 20.37        | 19.68        | 18.61        | 18.33        | 18.17        | 16.46        | 14.48        | 13.18        | 11.17        |
| ≥65           | 1727/110 689          | 15.60                                 | 16.06        | 15.12        | 14.76        | 14.00        | 12.95        | 12.80        | 11.85        | 11.09        | 10.17        | 8.41         | 7.56         | 6.12         |
