# Supplementary material
Source: PubMed Central journal article supplement (PMC4787493)
Supplement: moom654327.wt4_default.pdf [file moom654327.wt4_default.pdf]

**Web table D** Prescriptions for an antidepressant in the first year of diagnosis and in any year after and up to the fifth year after the first diagnosis

| Event year | Incident cases of diagnosis of depression at baseline year | Percentage of cases who received a prescription for an antidepressant at baseline year* | Number and percentage of patients who received a prescription for an antidepressant up to 5 years after diagnosis† |                 |                |                |                |
|------------|------------------------------------------------------------|-----------------------------------------------------------------------------------------|--------------------------------------------------------------------------------------------------------------------|-----------------|----------------|----------------|----------------|
|            |                                                            |                                                                                         | 1st‡                                                                                                               | 2nd§            | 3rd§           | 4th§           | 5th§           |
| 1993       | 14 066                                                     | 79.33%                                                                                  | 11 159                                                                                                             | —               | —              | —              | —              |
| 1994       | 14 882                                                     | 79.67%                                                                                  | 11 857                                                                                                             | 4533<br>40.62%  | —              | —              | —              |
| 1995       | 15 911                                                     | 79.68%                                                                                  | 12 678                                                                                                             | 5221<br>44.03%  | 3128<br>28.03% | —              | —              |
| 1996       | 16 435                                                     | 80.43%                                                                                  | 13 218                                                                                                             | 5558<br>43.84%  | 3442<br>29.03% | 2839<br>25.44% | —              |
| 1997       | 16 831                                                     | 80.65%                                                                                  | 13 575                                                                                                             | 6 038<br>45.68% | 3774<br>29.77% | 3123<br>26.34% | 2619<br>23.47% |
| 1998       | 16 283                                                     | 80.53%                                                                                  | 13 113                                                                                                             | 6291<br>46.34%  | 3957<br>29.94% | 3275<br>25.83% | 2815<br>23.74% |
| 1999       | 15 832                                                     | 80.04%                                                                                  | 12 672                                                                                                             | 6264<br>47.77%  | 4188<br>30.85% | 3422<br>25.89% | 2942<br>23.21% |
| 2000       | 15 910                                                     | 79.77%                                                                                  | 12 692                                                                                                             | 6248<br>49.31%  | 4144<br>31.60% | 3604<br>26.55% | 3108<br>23.51% |
| 2001       | 15 645                                                     | 79.91%                                                                                  | 12 502                                                                                                             | 6339<br>49.94%  | 4144<br>32.70% | 3558<br>27.13% | 3252<br>23.96% |
| 2002       | 14 473                                                     | 79.98%                                                                                  | 11 576                                                                                                             | 6430<br>51.43%  | 4121<br>32.47% | 3547<br>27.99% | 3287<br>25.07% |
| 2003       | 13 091                                                     | 78.42%                                                                                  | 10 266                                                                                                             | 5893<br>50.91%  | 4034<br>32.27% | 3404<br>26.82% | 3078<br>24.29% |
| 2004       | 11 971                                                     | 76.71%                                                                                  | 9183                                                                                                               | 5180<br>50.46%  | 3778<br>32.64% | 3374<br>26.99% | 3038<br>23.94% |
| 2005       | 8521                                                       | 74.33%                                                                                  | 6334                                                                                                               | 4471<br>48.69%  | 3125<br>30.44% | 2978<br>25.73% | 2808<br>22.46% |

\*Percentage of cases who received a prescription for an antidepressant at baseline year refers to percentage of incident cases who were prescribed at least one antidepressant during the year of first diagnosis.

†Figures along each downward diagonal line indicate a cohort of patients who had the same year of first diagnosis of depression.

‡The number of cases in the first year of diagnosis who received at least one antidepressant was calculated by multiplying the incident cases of diagnosis of depression at baseline year (second column) by the percentage of cases who received a prescription for an antidepressant at baseline year (third column).

§Percentages in the last four columns refer to the number of patients who remained on antidepressants relative to the number receiving antidepressants in the first year of diagnosis.
